1           **Interactive effects of herbivory and the level and fluctuations of nutrient**  
2           **availability on dominance of alien plants in synthetic native communities**

3

4   Yanjun Li<sup>1,2</sup>, Yingzhi Gao<sup>2</sup>, Mark van Kleunen<sup>3,4</sup>, Yanjie Liu<sup>1,3\*</sup>

5

6   <sup>1</sup>*Key Laboratory of Wetland Ecology and Environment, Northeast Institute of*  
7   *Geography and Agroecology, Chinese Academy of Sciences, Changchun, 130102,*  
8   *China*

9   <sup>2</sup>*Key Laboratory of Vegetation Ecology, Northeast Normal University, Changchun,*  
10   *130024, China*

11   <sup>3</sup>*Ecology, Department of Biology, University of Konstanz, 78464 Konstanz, Germany*

12   <sup>4</sup>*Zhejiang Provincial Key Laboratory of Plant Evolutionary Ecology and*  
13   *Conservation, Taizhou University, Taizhou 318000, China*

14

15   \*Email of corresponding author: liuyanjie@iga.ac.cn +86 431 82536096

16

17   Running title: Herbivory mediates nutrient-change effects on plant invasion

18

## 19    **Abstract**

20        Numerous studies have highlighted the role of nutrient availability and  
 21    fluctuations therein for invasion success of alien plants. Others also highlighted the  
 22    role of herbivores in invasion success. However, how herbivory and the level and  
 23    fluctuations in nutrient availability interact in driving alien plant invasion into resident  
 24    communities remains largely unexplored.

25        We grew eight invasive alien species as target species in pot mesocosms with  
 26    five different synthetic native communities in a three-factorial design with two levels  
 27    of nutrient availability (low vs high), two levels of nutrient fluctuations (constant vs  
 28    pulsed) and two levels of herbivory (with vs without).

29        The relative biomass production of the alien target plants decreased in response  
 30    to an increase in nutrient availability, and increased in response to the presence of  
 31    herbivores. Furthermore, herbivory could interact with changes in nutrient availability  
 32    and nutrient fluctuations to affect the dominance of the alien target species (a  
 33    marginally significant interaction; 90% CIs: [0.125, 2.712]).

34        Our multispecies experiment indicates that herbivory could mediate the  
 35    interactive effect of nutrient enrichment and variability in nutrient supply on invasion  
 36    of alien plants into native communities. Therefore, we recommend that studies testing  
 37    the fluctuating resources hypothesis should also consider interactive effect of other  
 38    trophic levels.

39

40    **Keywords:** biological invasions, exotic plants, global change, plant-herbivore  
 41    interactions, resource variability, trophic level

42

## 43    **Introduction**

44        Invasion by alien plants could reduce native biodiversity, influence ecosystem  
45    functions, and degrade ecosystem services [1]. Due to the rapid globalization, the  
46    increase in the number of naturalized alien plant species does not show any sign of  
47    saturation, and it was recently predicted that their numbers may increase on average  
48    by 18% from 2005 to 2050 [2-4]. Therefore, a major research objective in the field of  
49    ecology is to identify the mechanisms that underlie alien plant invasion [5-9].

50        It has frequently been suggested that an increase in soil-nutrient availability is  
51    one of the most important drivers of alien plant invasion [8, 10, 11]. As successful  
52    alien plant species are often introduced from anthropogenic and more nutrient-rich  
53    environments, they might be more likely to be adapted to high-nutrient environments  
54    [12, 13]. Indeed, both a recent meta-analysis [14] and a globally replicated study of 64  
55    grasslands [15] showed that successful alien plants respond more strongly to nitrogen  
56    enrichment than native plants do. So far, empirical studies that tested how  
57    soil-nutrient changes affect alien plant invasion mainly focused on changes in the  
58    mean nutrient level [16-22]. However, due to increasing occurrences of extreme  
59    events (i.e., droughts, floodings, heat waves, fires), soil-nutrient changes also entail  
60    changes in their variability, and this may affect plant invasions [20, 23]. Therefore, it  
61    is important to test how changes in soil-nutrient levels, as well as fluctuations in  
62    nutrient availability over time, drive alien plant invasion in resident communities.

63        The fluctuating resource hypothesis proposes that temporal fluctuations in  
64    nutrient supply could promote alien plant invasion in resident communities [10].  
65    However, empirical studies testing the hypothesis found mixed results. For example,  
66    Parepa et al. found that a pulsed nutrient supply, compared to a constant nutrient  
67    supply, increased the dominance of the invasive plants *Fallopia japonica* and *F. ×*

68 *bohemica* in experimental plant communities [23]. In contrast, Liu et al. showed that a  
 69 pulsed nutrient supply decreased the dominance of invasive alien plants [24]. Thus,  
 70 more studies are needed to test the hypothesis, and why the results might vary. The  
 71 studies that tested the effect of temporal changes in nutrient availability did so under  
 72 overall nutrient-rich conditions. Under more nutrient-limiting conditions, however,  
 73 the effect of temporal fluctuations may be even stronger. In other words, mean  
 74 nutrient availability may interact with temporal fluctuations in nutrient availability to  
 75 affect alien plant invasion into resident communities. However, very few studies have  
 76 tested whether this expectation holds [25].

77 Although the fluctuating resource hypothesis has become a key theory in  
 78 invasion ecology, previous tests only used study systems consisting of a single trophic  
 79 level (i.e., only considered plant-plant interactions). Plant growth, however, can be  
 80 strongly regulated by other trophic levels, such as herbivores. This might be relevant  
 81 for the fluctuating resource hypothesis as alien species are likely to be released from  
 82 most of their native enemies, and thus should suffer less herbivory than native species  
 83 in their introduced regions [26-28]. Following this logic, the presence of herbivores,  
 84 just like increases in resource availability and fluctuations therein [20, 23, 29, 30],  
 85 could promote alien plant invasion in resident communities. Moreover, as herbivore  
 86 effects on plants are often regulated by soil-nutrient availability, because plants  
 87 growing in relatively high-nutrient conditions might be better able to compensate or  
 88 tolerate herbivory [31-34], the effects of herbivores might interact with the effects of  
 89 nutrients. Therefore, it is reasonable to assume that the presence of herbivores might  
 90 amplify the positive effect of increases in resource availability and fluctuations on  
 91 alien plant invasion.

92 To test the individual effects of nutrient availability, nutrient fluctuations,

herbivory, and their interactions on alien plant invasion into resident communities, we grew eight invasive alien species as target species in pot mesocosms with five different synthetic native communities, each consisting of three grassland species. Then, we exposed the plants to eight combinations of two nutrient availability (low vs high), two nutrient-fluctuation (constant vs pulsed) and two herbivory (with vs without) treatments. By comparing the absolute aboveground biomass production of the alien target species as well as their biomass production relative to the biomass production of the native competitors, we addressed the following specific questions:

- 1) Do nutrient availability, nutrient fluctuations and the presence of herbivores promote the absolute and relative biomass of alien plants?
- 2) Does the effect of nutrient fluctuations on absolute and relative biomass of alien plants depend on the overall nutrient availability level?
- 3) Does the presence of herbivores interact with increases in nutrient availability and fluctuations therein to affect the absolute and relative biomass of alien plants?

## 108 **Material and methods**

### 109 *Study species*

110 To investigate the individual and interactive effects of nutrient availability,  
 111 nutrient fluctuations and the presence of herbivores on alien plant invasion into  
 112 resident communities, we chose eight invasive alien species as targets, and 15 native  
 113 species as native community members from the herbaceous flora of China (Table S1).  
 114 We classified these species as invasive alien or native to China based on information  
 115 in the book “The Checklist of the Alien Invasive Plants in China” [35] and the Flora  
 116 of China database ([www.efloras.org](http://www.efloras.org)). To cover a wide taxonomic breadth, we  
 117 selected the eight alien target species from seven genera of three families. As plants  
 118 with different life histories (i.e., annuals or perennials) may respond differently to  
 119 nutrient availability and fluctuations [20, 36], we assured that both the alien targets  
 120 and native community members included annuals and perennials (Table S1). Seeds of  
 121 these species were collected in natural populations in grasslands in China or ordered  
 122 from a commercial seed company (see Table S1).

123 To impose a herbivory treatment, we selected two aboveground insect herbivores.  
 124 As natural systems usually include both generalist and specialist insect herbivores, we  
 125 chose the generalist grasshopper *Stenocatantops splendens* and the specialist  
 126 grasshopper *Locusta migratoria* (i.e., grass-feeder) as the shoot herbivores. The  
 127 grasshoppers were acquired from a commercial insect company (Cangzhou  
 128 Grasshoppers Breeding Center, China). As both grasshoppers and all plant species  
 129 occur mainly in grasslands, and according to the GBIF database ([www.gbif.org](http://www.gbif.org)),  
 130 overlap in their distributions, they are very likely to co-occur in nature.

### 131 *Pre-cultivation and experimental setup*

We conducted the experiment at the Northeast Institute of Geography and Agroecology, Chinese Academy of Sciences (43°5'49"N, 125°24'40"E). From 7 May to 26 June 2020, we sowed each of the invasive alien and native species separately into plastic circular trays (diameter = 25.5 cm, height = 4 cm) filled with potting soil (Pindstrup Plus, Pindstrup Mosebrug A/S, 103 Denmark; pH 6; 120 mg/L N; 12 mg/L P; 400 mg/L K; 28 mg/L Mg; 0.4 mg/L B; 2 mg/L Mo; 1042 mg/L Cu; 3 mg/L Mn; 0.9 mg/L Zn; 8 mg/L Fe). Because the time required for germination varies among the species, we sowed them at different times (Table S1) to ensure that at transplanting the seedlings were in a similar developmental stage. All trays with seeds were kept in a greenhouse (temperature: 18-27°C; natural lighting with an intensity of ~75% of the light outdoors; and ~68% relative humidity).

On 10 July 2020, we selected similar-sized seedlings from each of the eight invasive alien and 15 native species, and transplanted them into 2.5 L circular plastic pots (top diameter: 18.5 cm, bottom diameter: 12.5 cm, height: 15 cm) filled with a 1:1 mixture of sand and fine vermiculite. We transplanted one seedling of an alien target species in the center of each pot. For each of the eight alien target species, we transplanted a total of 40 seedlings into 40 pots (i.e., one individual per pot), resulting in total of 320 pots. Immediately after transplanting the alien target species, we equally distributed the 40 pots of each alien target over five different native communities (i.e., eight pots per native community). To create the five different native grassland communities, we randomly assigned the 15 native species into five groups of three species (Table S1). We planted two seedlings of each native community member, so that each pot included six individuals of native species equally spaced in a circle (diameter = 10 cm) around the alien target seedling. The two individuals of the same species were planted at opposite positions of the circle

(Fig. 1a). After transplanting, we randomly assigned all pots to two cages ( $3.5 \times 4.5 \times 2.5$  m) located outside of the pre-cultivation greenhouse. The cages were covered with transparent plastic roofs and white nylon net (mesh size:  $0.25 \times 0.25$  mm) all around. Half of the pots of each combination of an alien target species and a specific native community were assigned to one cage, and the remaining ones to the other cage (Fig. 1a). In other words, each cage included 160 pots in total (8 alien target species  $\times$  5 native communities  $\times$  4 nutrient-supply treatments [2 nutrient availability  $\times$  2 nutrient fluctuation treatments]). To avoid the loss of water and nutrient solution, we put a plastic tray under each pot. We re-randomized the positions of the pots in each cage after five weeks.

On 14 July 2020 (i.e., one week after transplanting), we started to apply the nutrient treatments at weekly intervals for a total of 10 weeks (Fig. 1b). We applied two nutrient availability treatments (low vs high) crossed with two nutrient-fluctuation treatments (constant vs pulsed), using a 400% strength Hoagland solution (Methods S1). During the experiment, we added a total of 50 and 400 ml of the Hoagland solution to the low and high-nutrient availability pots, respectively. Although it is difficult to compare the absolute nutrient levels in a pot experiment to those found in a natural system, Liu et al. previously showed that both the low- and high-nutrient availabilities are limiting plant growth, as is usually the case in nature [24]. Within each nutrient-availability treatment, we created two different nutrient-supply patterns, a constant nutrient supply and a pulsed nutrient supply (Fig. 1b). We supplied 5 ml of the nutrient solution for the constant low-nutrient supply each week, and 40 ml of the same nutrient solution for the constant high-nutrient supply. The pulsed treatment at low-nutrient availability consisted of three weeks of 2 ml per week, followed by four weeks of 9.5 ml per week, and again three weeks of 2 ml per week (Fig. 1b). The



182 pulsed treatment at high-nutrient availability consisted of three weeks of 10 ml a week,  
183 followed by four weeks of 85 ml, and again three weeks of 10 ml (Fig. 1b). To avoid  
184 differences in water supply among the four treatments, we added extra water to the  
185 amount of nutrient solution in each treatment to ensure that each pot received a total  
186 of 85 ml of water per nutrient application. In each cage, there were five replicates per  
187 alien target species for each of the four nutrient-supply treatments (i.e., one replicate  
188 for each of the five native communities). We watered all plants regularly by filling the  
189 dish under each pot to avoid water limitation.

190 The herbivory treatment started on 14 August 2020, and ended six weeks later on  
191 20 September 2020. We added the grasshoppers in one of the two cages, and treated  
192 the other cage as control (Fig. 1a). As the commercial company hatched these two  
193 species of grasshoppers at different times, we added *Locusta migratoria* from 14  
194 August to 6 September 2020, and *Stenocatantops splendens* from 31 August to 6  
195 September 2020. We checked the herbivory pressure every day to determine whether  
196 we would add more grasshoppers. During the experiment, we added *Locusta*  
197 *migratoria* seven times (three times for 3–4<sup>th</sup> instars and four times for adults), and  
198 *Stenocatantops splendens* two times (one time for 3–4<sup>th</sup> instars and the other time for  
199 adults). In total, we added 354 individuals of *Locusta migratoria*, and 450 individuals  
200 of *Stenocatantops splendens* in the herbivory-treatment cage.

## 201 *Measurements*

202 On 25 September 2020 (i.e., eleven weeks after transplanting), we harvested the  
203 aboveground biomass of all pots. For each pot, we first harvested the alien target  
204 species and then the three native competitor species. As some alien target and native  
205 plants died and three pots had accidentally been treated with the wrong nutrient  
206 solution, we only harvested 274 instead of 320 pots (see the raw data on

207 <https://doi.org/10.5061/dryad.fj6q573vn>) [37]. We did not harvest the roots of the  
208 alien and native species, because the roots of the species were intertwined, and it was  
209 impossible to separate them. All aboveground biomass samples were dried at 65°C for  
210 72 hours and then weighed. We calculated total aboveground biomass per pot by  
211 summing the biomass of the alien target species and the three native competitors. We  
212 also calculated the biomass proportion of the alien target species in each pot as the  
213 ratio between the biomass of the alien target species and the total aboveground  
214 biomass per pot.

# 215 *Statistical analysis*

216 To test the effects of nutrient availability (low vs high), nutrient fluctuations  
217 (constant vs pulsed), herbivory treatments (with vs without) and their interactions on  
218 aboveground biomass production of the alien target species, biomass production of  
219 the native communities and biomass proportion of the alien target species in each pot,  
220 we fitted Bayesian multilevel models using the function `brm` of the R package `brms`  
221 [38] in R 4.0.2 [39]. In all models, we included the following explanatory variables  
222 nutrient availability (low vs high), nutrient fluctuations (constant vs pulsed) and  
223 herbivory treatment (with vs without) as fixed factors. To account for phylogenetic  
224 non-independence of species belonging to the same family and for non-independence  
225 of replicates of the same species, we included identity of the alien target species  
226 nested in their family as random factors in all models. To account for variation among  
227 the five different native communities, we also included identity of the native  
228 community as random factor in all models. To relax the homogeneity of variance  
229 assumption in all models, we allowed the residual standard deviation  $\sigma$  to vary by  
230 the identity of alien target species [40].

231 For all models, we used the default priors set by the brms package, and ran four  
 232 independent chains. The number of total iterations per chain was 5000, and the  
 233 number of warm-up samples was 2500. To directly test hypotheses about the main  
 234 effects and interactive effects based on each coefficient's posterior distribution, we  
 235 used the sum coding, which effectively 'centers' the effects to the grand mean (i.e.,  
 236 the mean value of all data observations) [41]. To implement this in brms, we used the  
 237 functions contrasts and contr.sum of the stats package in R. We considered the fixed  
 238 effects nutrient availability, nutrient fluctuation and herbivory treatments, and their  
 239 interactions as significant when their 95% credible interval of the posterior  
 240 distribution did not overlap zero, and as marginally significant when the 90% credible  
 241 interval did not overlap zero. As we had only two cages available, one with herbivores  
 242 and one without herbivores, our herbivory treatment is obviously pseudoreplicated  
 243 [42]. This means that the main effect of herbivory should be interpreted with care  
 244 [43]. However, it still allows us to test whether the effects of the nutrient availability  
 245 and nutrient fluctuation treatments differ between the cage with and without  
 246 herbivores.  
 247

## Results

Averaged across the nutrient fluctuation and herbivory treatments, an increase in nutrient availability significantly increased the biomass production of alien target species (+600.7%; Table 1; Fig. 2 and Fig. S1) and the biomass production of native communities (+601.0%; Table 1; Fig. 2 and Fig. S1). The presence of herbivores, however, significantly decreased the biomass production of native communities (-39.4%; Table 1; Fig. 2 and Fig. S2). The similar pattern was found for the biomass production of alien target species (-44.3%; Table 1; Fig. 2 and Fig. S2), although it was only marginally significant (90% CIs: [-0.170, -0.010]). The negative effect of herbivory on the biomass production of both alien target species and native communities was stronger under high-nutrient availability (alien: -46.4%; native: -39.7%) than under low-nutrient availability (alien: -28.0%; native: -36.6%; significant NA  $\times$  H interactions in Table 1; Fig. 2 and Fig. S3).

We found that an increase in nutrient availability significantly decreased (-6.5%; Table 1; Fig. 2 and Fig. S1), whereas the presence of herbivores significantly increased the relative biomass production of the alien target species in the native communities (+3.6%; Table 1; Fig. 2 and Fig. S2). Additionally, under low-nutrient availability, the pulsed nutrient supply tended to increase the relative biomass production of the alien target plants in the absence of herbivores (+7.9%), whereas the reverse was true for plants in the presence of herbivores (-18.8%; Fig. 2). Under low-nutrient availability, however, pulsed nutrient supply and the presence of herbivores did not affect the relative biomass production of the alien target species (Fig. 2). The dependency of the effect of the nutrient fluctuation treatment on the levels of the other treatments was indicated by a marginally significant interaction between herbivory, nutrient availability and fluctuation therein (90% CIs: [0.125, 2.712]) in Table 1.

## 274 **Discussion**

275       Our multispecies experiment showed that an increase of nutrient availability  
276 promoted the biomass production for both the alien target species and native  
277 communities. However, herbivory suppressed the biomass production of plants, in  
278 particular under high-nutrient availability. We found that increases in nutrient  
279 availability suppressed, whereas herbivory promoted the dominance of the alien target  
280 species in native resident communities. Interestingly, we also found tentative evidence  
281 that herbivory could interact with changes in nutrient availability and nutrient  
282 fluctuations to affect the dominance of the alien target species. In other words,  
283 herbivory could mediate the interactive effect of nutrient enrichment and fluctuations  
284 in nutrient supply on alien plant invasion into native communities.

285       Although each pot had one invasive alien and six native plants, the invasive plant  
286 accounted for about one quarter of the aboveground biomass in each pot (Fig. 2c).  
287 This suggests that the invasive alien species were more dominant than the native  
288 species. We also found that this dominance decreased with an increase of the average  
289 nutrient availability. This finding does not support the idea that increased nutrient  
290 availability could promote alien plant invasion in resident communities, although  
291 many theoretical [10, 44] and empirical studies [14, 15, 20, 23, 25] found evidence for  
292 this. A potential reason could be that in our study the native species themselves are  
293 also quite common, and it are usually the rare species that take less advantage of  
294 increased nutrient availability [45].

295       Previous empirical studies testing the nutrient-fluctuation effect on alien plant  
296 invasion found mixed results [20, 23-25, 46, 47]. We hypothesized that this might be  
297 because the effect of temporal fluctuations may be even stronger under more  
298 nutrient-limiting conditions than under less nutrient-limiting conditions. However, we

found no significant interactive effect of nutrient availability and fluctuations therein on the aboveground biomass and dominance of alien target plants in native communities. This is in line with the results of a recent case study by Gao et al. [25]. It is worth noting though that in the absence of herbivory, the absolute and relative aboveground biomass of the invasive alien plants tended to be higher in the low, pulsed nutrient treatment than in the low, constant treatment, while the reverse was true in the presence of herbivory.

Not surprisingly, herbivory decreased the biomass production of plants (also see the total biomass production per pot in Fig. S4a and Fig. S4b). In particular, the biomass suppression of herbivory was stronger under high-nutrient availability than under low-nutrient availability (Fig. S4c). This seems inconsistent with previous findings that plants compensate or tolerate herbivory more when growing in high nutrient conditions [31, 32, 48-51]. However, it should be noted that in our experiment, the herbivores could choose between the plants. As the plants grown at high-nutrient availabilities might be more nutritious [52-55], and have decreased plant secondary metabolite concentrations such as tannins [56, 57], the herbivores might have preferably fed on the plants with high nutrient availabilities [53, 58-61]. On the other hand, we found that herbivory increased the dominance of the alien target species in the native resident communities. This is also not surprising, because according to the enemy release hypothesis, alien plants often have escaped from many of their herbivorous enemies, and therefore could in their introduced range outcompete resident plants [26].

When growing under low-nutrient availability and also in the absence of herbivores, the nutrient pulse promoted the dominance of alien plants, which supports the fluctuating resource hypothesis [10]. However, when growing under low-nutrient

availability but in the presence of herbivores, the nutrient pulse suppressed the dominance of alien plants in pots. This may because herbivores often reduce the abundance (biomass, cover) of dominant species [62, 63]. On the other hand, under high-nutrient availability, the nutrient pulse and the herbivory treatment hardly affected the dominance of alien plants. One plausibility explanation for this finding is that the overall high-nutrient availability reduces, or even cancels, the nutrient-limitation shifts over time caused by nutrient fluctuations [20, 24, 64], resulting in very weak effects of the nutrient pulse on dominance changes in plant communities [65]. In addition to the weak evidence that herbivory mediated the effects of changes in nutrient availability and fluctuations on alien plant invasion, a recent case study also found that the parasitic plant *Cuscuta australis* could also regulate the effects of nutrient availability and fluctuations on the invasion success of the alien plant *Bidens pilosa* [25](Gao et al. 2021). Therefore, if organisms from other trophic levels frequently mediate the effects of nutrient fluctuations on alien plant invasion, we recommend that studies testing the fluctuating resources hypothesis should more frequently consider the interactive effect of other trophic levels.

340

## 341 **Conclusions**

342 The fluctuating resource hypothesis has become a key theory for explaining  
343 invasion success of alien plants. However, our study is, to the best of our knowledge,  
344 the first multi-species experiment that tested how another trophic level influences the  
345 effects of nutrient fluctuations on alien plant invasion. Partly in line with the  
346 fluctuating resource hypothesis, we found tentative evidence that nutrient variability  
347 promotes alien plant invasion only under overall low-nutrient conditions, and only in  
348 the absence of herbivores. Therefore, other trophic levels, such as herbivores in our

349 study, might mediate the interactive effect of nutrient enrichment on alien plant  
350 invasion into resident communities.

351

### 352 **Acknowledgements**

353 We thank Xue Zhang, Mingxin Pan, Chunling Chang, Huifei Jin, Lichao Wang,  
354 Lingxi Wang, Liping Shan, Han Yu for set-up of the experiment and plant harvest,  
355 and we thank Mingxin Pan for weighing the biomass. This work was supported by  
356 funding from the Chinese Academy of Sciences (Y9B7041001).

357

### 358 **Author contributions**

359 Y Liu conceived the idea and designed the experiment. Y Li and Y Gao  
360 performed the experiment. Y Li and Y Liu analyzed the data. Y Li and Y Liu wrote  
361 the first draft of the manuscript, with further inputs from Y Gao and M van Kleunen.

362

### 363 **Data availability**

364 All data and code available from the Dryad Digital Repository  
365 <https://doi.org/10.5061/dryad.fj6q573vn> (Li et al., 2021).

366



## 367     **References**

- 368     1. Vilà M, Espinar JL, Hejda M, Hulme PE, Jarošík V, Maron JL, Jan P, Schaffner U,  
369     Sun Y, Pyšek P. 2011 Ecological impacts of invasive alien plants: a meta-analysis of  
370     their effects on species, communities and ecosystems. *Ecol. Lett.* **14**, 702-708. (doi:  
371     10.1111/j.1461-0248.2011.01628.x)
- 372     2. Seebens H *et al.* 2017 No saturation in the accumulation of alien species  
373     worldwide. *Nat. Commun.* **8**, 14435. (doi: 10.1038/ncomms14435)
- 374     3. Seebens H *et al.* 2020 Projecting the continental accumulation of alien species  
375     through to 2050. *Global Change Biol.* (doi: 10.1111/gcb .15333)
- 376     4. Gippet JMW, Bertelsmeier C. 2021 Invasiveness is linked to greater commercial  
377     success in the global pet trade. *P. Natl. Acad. Sci. USA* **118**, e2016337118. (doi:  
378     10.1073/pnas.2016337118)
- 379     5. Catford JA, Jansson R, Nilsson C. 2009 Reducing redundancy in invasion ecology  
380     by integrating hypotheses into a single theoretical framework. *Divers Distrib* **15**,  
381     22-40. (doi: 10.1111/j.1472-4642.2008.00521.x)
- 382     6. Schultheis EH, Berardi AE, Lau JA. 2015 No release for the wicked: enemy release  
383     is dynamic and not associated with invasiveness. *Ecology* **96**, 2446-2457. (doi:  
384     10.1890/14-2158.1)
- 385     7. Liu YJ, van Kleunen M. 2019 Nitrogen acquisition of Central European herbaceous  
386     plants that differ in their global naturalization success. *Funct. Ecol.* **33**, 566-575. (doi:  
387     10.1111/1365-2435.13288)
- 388     8. Enders M *et al.* 2020 A conceptual map of invasion biology: Integrating hypotheses  
389     into a consensus network. *Global Ecol. Biogeogr.* **29**, 978-991. (doi:  
390     10.1111/geb.13082)

- 391 9. Spei er B, Liu YJ, van Kleunen M. 2021 Biomass responses of widely and less-  
392 widely naturalized alien plants to artificial light at night. *J. Ecol.* **109**, 1819-1827.  
393 (doi: 10.1111/1365-2745.13607)
- 394 10. Davis MA, Grime JP, Thompson K. 2000 Fluctuating resources in plant  
395 communities: a general theory of invasibility. *J. Ecol.* **88**, 528-534. (doi:  
396 10.1046/j.1365-2745.2000.00473.x)
- 397 11. Bradley BA, Blumenthal DM, Wilcove DS, Ziska LH. 2010 Predicting plant  
398 invasions in an era of global change. *Trends Ecol. Evol.* **25**, 310-318. (doi:  
399 10.1016/j.tree.2009.12.003)
- 400 12. Dost l P, Dawson W, van Kleunen M, K ser LH, Fischer M. 2013 Central  
401 European plant species from more productive habitats are more invasive at a global  
402 scale. *Global Ecol. Biogeogr.* **22**, 64-72. (doi: 10.1111/j.1466-8238.2011.00754.x)
- 403 13. Kalusov  V *et al.* 2017 Naturalization of European plants on other continents: The  
404 role of donor habitats. *P. Natl. Acad. Sci. USA*, 13756. (doi:  
405 10.1073/pnas.1705487114)
- 406 14. Liu YJ, Oduor AMO, Zhang Z, Manea A, Tooth IM, Leishman MR, Xu XL, van  
407 Kleunen M. 2017 Do invasive alien plants benefit more from global environmental  
408 change than native plants? *Global Change Biol.* **23**, 3363-3370. (doi:  
409 10.1111/gcb.13579)
- 410 15. Seabloom EW *et al.* 2015 Plant species' origin predicts dominance and response  
411 to nutrient enrichment and herbivores in global grasslands. *Nat. Commun.* **6**, 1-8. (doi:  
412 10.1038/ncomms8710)
- 413 16. Py ek P, Jaro   k V, Hulme PE, Pergl J, Hejda M, Schaffner U, Vil  M. 2012 A  
414 global assessment of invasive plant impacts on resident species, communities and  
415 ecosystems: the interaction of impact measures, invading species' traits and

- environment. *Global Change Biol.* **18**, 1725-1737. (doi: 10.1111/j.1365-2486.2011.02636.x)
17. Manea A, Leishman MR. 2015 Competitive interactions between established grasses and woody plant seedlings under elevated CO<sub>2</sub> levels are mediated by soil water availability. *Oecologia* **177**, 499-506. (doi: 10.1007/s00442-014-3143-z)
18. Jia JJ, Dai ZC, Li F, Liu YJ. 2016 How will global environmental changes affect the growth of alien plants? *Front. plant sci.* **7**, 1623. (doi: 10.3389/fpls.2016.01623)
19. Heckman RW, Halliday FW, Wilfahrt PA, Mitchell CE. 2017 Effects of native diversity, soil nutrients, and natural enemies on exotic invasion in experimental plant communities. *Ecology* **98**, 1409-1418. (doi: 10.1002/ecy.1796)
20. Liu YJ, van Kleunen M. 2017 Responses of common and rare aliens and natives to nutrient availability and fluctuations. *J. Ecol.* **105**, 1111-1122. (doi: 10.1111/1365-2745.12733)
21. Sardans J, Bartrons M, Margalef O, Gargallo-Garriga A, Janssens IA, Ciais P, Obersteiner M, Sigurdsson BD, Chen HYH, Peñuelas J. 2017 Plant invasion is associated with higher plant-soil nutrient concentrations in nutrient-poor environments. *Global Change Biol.* **23**, 1282-1291. (doi: 10.1111/gcb.13384)
22. Kelso MA, Wigginton RD, Grosholz ED. 2020 Nutrients mitigate the impacts of extreme drought on plant invasions. *Ecology* **101**, e02980. (doi: 10.1002/ecy.2980)
23. Parepa M, Fischer M, Bossdorf O. 2013 Environmental variability promotes plant invasion. *Nat. Commun.* **4**, 1-4. (doi: 10.1038/ncomms2632)
24. Liu YJ, Zhang XQ, van Kleunen M. 2018 Increases and fluctuations in nutrient availability do not promote dominance of alien plants in synthetic communities of common natives. *Funct. Ecol.* **32**, 2594-2604. (doi: 10.1111/1365-2435.13199)

- 440 25. Gao FL, He QS, Xie RQ, Hou JH, Shi CL, Li JM, Yu FH. 2021 Interactive effects  
441 of nutrient availability, fluctuating supply, and plant parasitism on the post-invasion  
442 success of *Bidens pilosa*. *Biol. Invasions*, 1-12. (doi: 10.1007/s10530-021-02555-y)
- 443 26. Keane RM, Crawley MJ. 2002 Exotic plant invasions and the enemy release  
444 hypothesis. *Trends Ecol. Evol.* **17**, 164-170. (doi: 10.1016/S0169-5347(02)02499-0)
- 445 27. Blumenthal DM. 2006 Interactions between resource availability and enemy  
446 release in plant invasion. *Ecol. Lett.* **9**, 887-895. (doi:  
447 10.1111/j.1461-0248.2006.00934.x)
- 448 28. Zhang ZJ, Pan XY, Blumenthal D, van Kleunen M, Liu M, Li B. 2018 Contrasting  
449 effects of specialist and generalist herbivores on resistance evolution in invasive  
450 plants. *Ecology* **99**, 866-875. (doi: 10.1002/ecy.2155)
- 451 29. Pearson DE, Ortega YK, Villarreal D, Lekberg Y, Cock MC, Eren Ö, Hierro JL.  
452 2018 The fluctuating resource hypothesis explains invasibility, but not exotic  
453 advantage following disturbance. *Ecology* **99**, 1296-1305. (doi: 10.1002/ecy.2235)
- 454 30. Dawson W, Rohr RP, van Kleunen M, Fischer M. 2012 Alien plant species with a  
455 wider global distribution are better able to capitalize on increased resource  
456 availability. *New Phytol.* **194**, 859-867. (doi: 10.1111/j.1469-8137.2012.04104.x)
- 457 31. Meyer GA. 2000 Interactive effects of soil fertility and herbivory on *Brassica*  
458 *nigra*. *Oikos* **88**, 433-441. (doi: 10.1034/j.1600-0706.2000.880221.x)
- 459 32. Hawkes CV, Sullivan JJ. 2001 The impact of herbivory on plants in different  
460 resource conditions: a meta-analysis. *Ecology* **82**, 2045-2058. (doi: 10.2307/2680068)
- 461 33. Gianoli E, Salgado-Luarte C. 2017 Tolerance to herbivory and the resource  
462 availability hypothesis. *Biol. Lett.* **13**, 20170120. (doi: 10.1098/rsbl.2017.0120)

- 463 34. Hu XT, Dong BC. 2019 Herbivory and nitrogen availability affect performance of  
464 an invader *Alternanthera philoxeroides* and its native congener *A. sessilis*. *Flora* **257**,  
465 151412. (doi: 10.1016/j.flora.2019.05.011)
- 466 35. Ma JS, Li HR. 2018 The checklist of alien invasive plants in china. Beijing,  
467 China: Higher education press.
- 468 36. Roumet C, Urcelay C, Díaz S. 2006 Suites of root traits differ between annual and  
469 perennial species growing in the field. *New Phytol.* **170**, 357-368. (doi:  
470 10.1111/j.1469-8137.2006.01667.x)
- 471 37. Li YJ, Gao YZ, van Kleunen M, Liu YJ. 2021 Data from: Interactive effects of  
472 herbivory and the level and fluctuations of nutrient availability on dominance of alien  
473 plants in synthetic native communities, Dryad, Dataset. (doi:  
474 10.5061/dryad.fj6q573vn)
- 475 38. Bürkner PC. 2017 An R package for bayesian multilevel models using Stan. *J.*  
476 *Statist. Software* **80**. (doi: 10.18637/jss.v080.i01)
- 477 39. R Core Team. 2020. R: A language and environment for statistical computing. R  
478 Foundation for Statistical Computing, Vienna, Austria.
- 479 40. Zuur A, Ieno EN, Walker N, Saveliev AA, Smith GM. 2009 Mixed effects models  
480 and extensions in ecology with R. New York: USA Springer.
- 481 41. Schad DJ, Hohenstein S, Vasisht S, Kliegl R. 2020 How to capitalize on a priori  
482 contrasts in linear (mixed) models: A tutorial. *J. Mem. Lang.* **110**, 104038 (doi:  
483 10.1016/j.jml.2019.104038)
- 484 42. Hurlbert SH. 1984 Pseudoreplication and the Design of Ecological Field  
485 Experiments. *Ecol. Monogr.* **54**, 187-211. (doi: 10.2307/1942661)

- 486 43. Colegrave N, Ruxton GD. 2018 Using Biological Insight and Pragmatism When  
487 Thinking about Pseudoreplication. *Trends Ecol. Evol.* **33**, 28-35. (doi:  
488 10.1016/j.tree.2017.10.007)
- 489 44. Sher AA, Hyatt LA. 1999 The disturbed resource-flux invasion matrix: a new  
490 framework for patterns of plant invasion. *Biol. Invasions* **1**, 107-114. (doi:  
491 10.1023/A:1010050420466)
- 492 45. Dawson W, Fischer M, van Kleunen M. 2012 Common and rare plant species  
493 respond differently to fertilisation and competition, whether they are alien or native.  
494 *Ecol. Lett.* **15**. (doi: 10.1111/j.1461-0248.2012.01811.x)
- 495 46. Dener E, Kacelnik A, Shemesh H. 2016 Pea plants show risk sensitivity. *Curr.*  
496 *Biol.* **26**, 1763-1767. (doi: 10.1016/j.cub.2016.05.008)
- 497 47. Zhao CY, Liu YY, Shi XP, Wang YJ. 2020 Effects of soil nutrient variability and  
498 competitor identify on growth and co-existence among invasive alien and native  
499 clonal plants. *Environ. Pollut.* **261**, 113894. (doi: 10.1016/j.envpol.2019.113894)
- 500 48. Alvarenga R, Auad AM, Moraes JC, da Silva SEB, Rodrigues BS. 2019 Tolerance  
501 to nymphs and adults of *Mahanarva spectabilis* (Hemiptera: Cercopidae) by forage  
502 plants in fertilized soils. *Pest Manage. Sci.* **75**, 2242-2250. (doi: 10.1002/ps.5361)
- 503 49. Garcia LC, Eubanks MD. 2019 Overcompensation for insect herbivory: a review  
504 and meta-analysis of the evidence. *Ecology* **100**, e02585. (doi: 10.1002/ecy.2585)
- 505 50. Getman-Pickering ZL, Stack GM, Thaler JS. 2021 Fertilizer quantity and type  
506 alter mycorrhizae-conferred growth and resistance to herbivores. *J. Appl. Ecol.* **58**,  
507 931-940. (doi: 10.1111/1365-2664.13833)

508 51. Zhong ZW, Li XF, Sanders D, Liu YM, Wang L, Ortega YK, Pearson DE, Wang  
509 DL. 2021 Soil engineering by ants facilitates plant compensation for large herbivore  
510 removal of aboveground biomass. *Ecology*, e03312. (doi: 10.1002/ecy.3312)

511 52. Deng Q, Hui DF, Dennis S, Reddy KC. 2017 Responses of terrestrial ecosystem  
512 phosphorus cycling to nitrogen addition: A meta-analysis. *Global Ecol. Biogeogr.* **26**,  
513 713-728. (doi: 10.1111/geb.12576)

514 53. Sardans J, Grau O, Chen HYH, Janssens IA, Ciais P, Piao S, Peñuelas J. 2017  
515 Changes in nutrient concentrations of leaves and roots in response to global change  
516 factors. *Global Change Biol.* **23**, 3849-3856. (doi: 10.1111/gcb.13721)

517 54. Scalon MC, Haridasan M, Franco AC. 2017 Influence of long-term nutrient  
518 manipulation on specific leaf area and leaf nutrient concentrations in savanna woody  
519 species of contrasting leaf phenologies. *Plant Soil* **421**, 233-244. (doi:  
520 10.1007/s11104-017-3437-0)

521 55. Oldroyd GED, Leyser O. 2020 A plant's diet, surviving in a variable nutrient  
522 environment. *Science* **368**, eaba0196. (doi: 10.1126/science.aba0196)

523 56. Li FR, Dudley T, Chen BM, Chang XY, Liang LY, Peng SL. 2016 Responses of  
524 tree and insect herbivores to elevated nitrogen inputs: A meta-analysis. *Acta Oecol.*  
525 **77**, 160-167. (doi: 0.1111/geb.12576)

526 57. Jamieson MA, Burkle LA, Manson J, Runyon JB, Trowbridge AM, Zientek J.  
527 2017 Global change effects on plant-insect interactions: The role of phytochemistry.  
528 *Curr. Opin. Insect Sci.* **70**. (doi: 10.1016/j.cois.2017.07.009)

529 58. Kudo G. 2003 Variations in leaf traits and susceptibility to insect herbivory within  
530 a *Salix miyabeana* population under field conditions. *Plant Ecol.* **169**, 61-69. (doi:  
531 10.1023/A:1026209017627)

- 532 59. Borgström P, Strengbom J, Marini L, Viketoft M, Bommarco R. 2017 Above-and  
533 belowground insect herbivory modifies the response of a grassland plant community  
534 to nitrogen eutrophication. *Ecology* **98**, 545-554. (doi: 10.1002/ecy.1667)
- 535 60. Anderson TM *et al.* 2018 Herbivory and eutrophication mediate grassland plant  
536 nutrient responses across a global climatic gradient. *Ecology* **99**, 821-833. (doi:  
537 10.1002/ecy.2175)
- 538 61. Hernán G, Castejón I, Terrados J, Tomas F. 2019 Herbivory and resource  
539 availability shift plant defense and herbivore feeding choice in a seagrass system.  
540 *Oecologia* **189**, 719-732. (doi: 10.1007/s00442-019-04364-6)
- 541 62. Olff H, Ritchie ME. 1998 Effects of herbivores on grassland plant diversity.  
542 *Trends Ecol. Evol.* **13**, 261-265. (doi: 10.1016/S0169-5347(98)01364-0)
- 543 63. Koerner SE, Smith MD, Burkepile DE, Hanan NP, Avolio ML, Collins SL,  
544 Knapp AK, Lemoine NP, Forrester EJ, Eby S. 2018 Change in dominance determines  
545 herbivore effects on plant biodiversity. *Nature Ecol. Evol.* **2**, 1925-1932. (doi:  
546 10.1038/s41559-018-0696-y)
- 547 64. Allington GRH, Koons DN, Morgan Ernest SK, Schutzenhofer MR, Valone TJ.  
548 2013 Niche opportunities and invasion dynamics in a desert annual community. *Ecol.*  
549 *Lett.* **16**, 158-166. (doi: 10.1111/ele.12023)
- 550 65. Sakavara A, Tsirtsis G, Roelke DL, Mancy R, Spatharis S. 2018 Lumpy species  
551 coexistence arises robustly in fluctuating resource environments. *P. Natl. Acad. Sci.*  
552 *USA* **115**, 738-743. (doi: 10.1073/pnas.1705944115)



**Table 1** Output of the models testing effects of nutrient availability (low vs high), nutrient fluctuations (constant vs pulsed), herbivory treatments (with vs without), and their interactions on aboveground biomass production of the alien target species, biomass production of the native communities and biomass proportion of the alien target species in each pot. Shown are the model estimates and standard errors as well as the lower (L) and upper (U) values of the 95% and 90% credible intervals (CI).

|                                                  |                            | Estimate | SE     | L95% CI | U95% CI | L90% CI | U90% CI |
|--------------------------------------------------|----------------------------|----------|--------|---------|---------|---------|---------|
| <b>Biomass production of alien target plants</b> | Intercept                  | 1.105    | 0.786  | -0.506  | 2.634   | -0.105  | 2.279   |
|                                                  | Nutrient availability (NA) | 0.416*   | 0.058  | 0.303   | 0.532   | 0.322   | 0.515   |
|                                                  | Nutrient fluctuation (NF)  | 0.046    | 0.047  | -0.047  | 0.139   | -0.032  | 0.124   |
|                                                  | Herbivory treatment (H)    | -0.090†  | 0.049  | -0.185  | 0.005   | -0.170  | -0.010  |
|                                                  | NA×H                       | -0.113*  | 0.048  | -0.208  | -0.018  | -0.190  | -0.035  |
|                                                  | NF×H                       | -0.009   | 0.048  | -0.104  | 0.086   | -0.087  | 0.071   |
|                                                  | NA×NF                      | 0.031    | 0.049  | -0.066  | 0.127   | -0.050  | 0.111   |
|                                                  | NA×NF×H                    | 0.020    | 0.049  | -0.076  | 0.116   | -0.060  | 0.100   |
| <b>Biomass production of native communities</b>  | Intercept                  | 3.529*   | 1.154  | 1.114   | 5.759   | 1.609   | 5.321   |
|                                                  | Nutrient availability (NA) | 3.252*   | 0.110  | 3.033   | 3.467   | 3.069   | 3.434   |
|                                                  | Nutrient fluctuation (NF)  | 0.023    | 0.111  | -0.191  | 0.238   | -0.158  | 0.204   |
|                                                  | Herbivory treatment (H)    | -1.150*  | 0.109  | -1.361  | -0.939  | -1.328  | -0.973  |
|                                                  | NA×H                       | -0.735*  | 0.110  | -0.951  | -0.520  | -0.913  | -0.554  |
|                                                  | NF×H                       | -0.144   | 0.109  | -0.359  | 0.071   | -0.324  | 0.035   |
|                                                  | NA×NF                      | -0.044   | 0.109  | -0.254  | 0.167   | -0.224  | 0.133   |
|                                                  | NA×NF×H                    | -0.086   | 0.109  | -0.302  | 0.129   | -0.267  | 0.095   |
| <b>Biomass proportion of alien target plants</b> | Intercept                  | 23.129*  | 11.495 | 0.112   | 46.144  | 4.487   | 41.768  |
|                                                  | Nutrient availability (NA) | -1.890*  | 0.766  | -3.387  | -0.380  | -3.127  | -0.623  |
|                                                  | Nutrient fluctuation (NF)  | 0.649    | 0.753  | -0.820  | 2.125   | -0.592  | 1.897   |
|                                                  | Herbivory treatment (H)    | 4.229*   | 0.882  | 2.470   | 5.937   | 2.754   | 5.647   |
|                                                  | NA×H                       | -1.064   | 0.766  | -2.554  | 0.435   | -2.321  | 0.182   |
|                                                  | NF×H                       | -0.57    | 0.765  | -2.079  | 0.921   | -1.835  | 0.665   |
|                                                  | NA×NF                      | 0.918    | 0.770  | -0.636  | 2.419   | -0.343  | 2.188   |
|                                                  | NA×NF×H                    | 1.432†   | 0.786  | -0.123  | 2.959   | 0.125   | 2.712   |

557 Parameters whose 95% credible intervals do not overlap with zero are indicted with asterisks (\*), and whose 90% credible intervals do  
558 not overlap with zero are indicated with daggers (†). Residual standard deviations *sigma* for individual alien species are found in  
559 Table S2.

## Figure legends

**Figure 1** Graphical illustration of the experimental design. Overview of the herbivory treatment, the herbivory-treatment cage during the experiment, and the pot design (a); the amount of nutrient solution supplied each week during the ten weeks of the experiment (b). The constant and pulsed nutrient supply under low- or high-nutrient availability received the same total amount of nutrients during the ten weeks.

**Figure 2** Mean values ( $\pm$ SE) of biomass production of alien target species (a) and native communities (b) and biomass proportion of the alien target species (c) under each combination of two nutrient availability (low vs high), two nutrient-fluctuation (constant vs pulsed) and two herbivory (with vs without) treatments. Parameters whose 95% credible intervals do not overlap with zero are indicted with asterisks (\*), whose 90% credible intervals do not overlap with zero are indicated with daggers ( $\dagger$ ), and whose 90% credible intervals do not overlap with zero are indicated with “ns”.

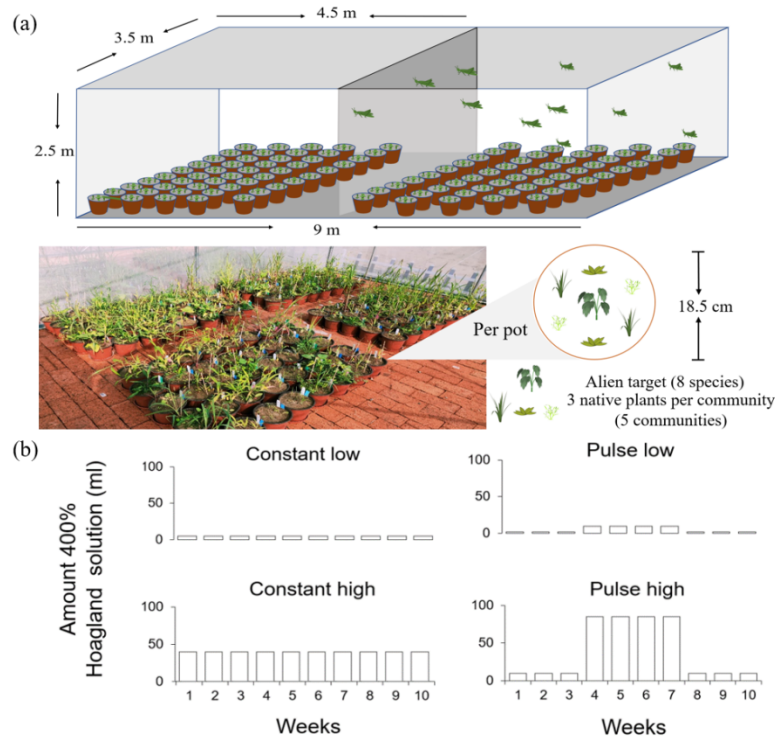

**Figure 1** Graphical illustration of the experimental design. Overview of the herbivory treatment, the herbivory-treatment cage during the experiment, and the pot design (a); the amount of nutrient solution supplied each week during the ten weeks of the experiment (b). The constant and pulsed nutrient supply under low- or high-nutrient availability received the same total amount of nutrients during the ten weeks.

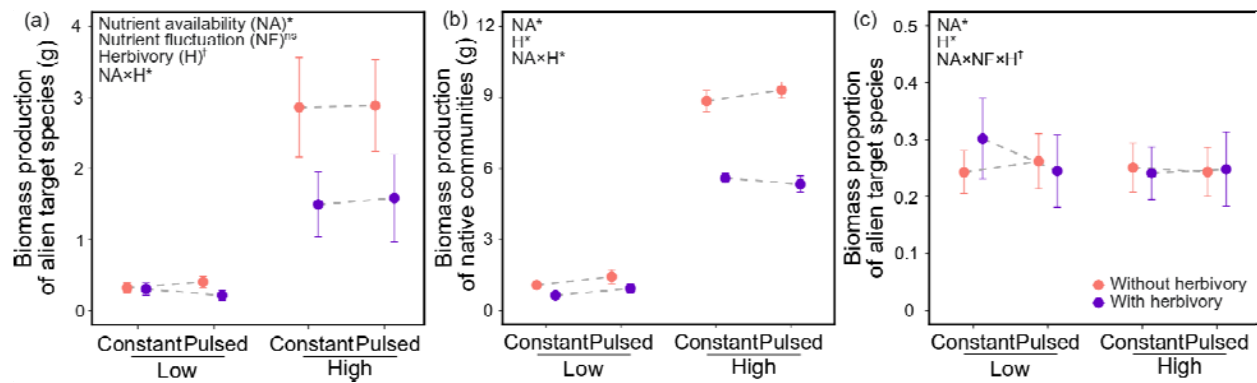

**Figure 2** Mean values ( $\pm$ SE) of biomass production of alien target species (a) and native communities (b) and biomass proportion of the alien target species (c) under each combination of two nutrient availability (low vs high), two nutrient-fluctuation (constant vs pulsed) and two herbivory (with vs without) treatments. Parameters whose 95% credible intervals do not overlap with zero are indicted with asterisks (\*), whose 90% credible intervals do not overlap with zero are indicated with daggers (†), and whose 90% credible intervals do not overlap with zero are indicated with “ns”.

## Supporting information

### Methods S1

#### Recipe for 400% strength Hoagland's Complete Nutrient Solution

The preparation of Hoagland nutrient solution essentially followed recommendations by Hoagland and Arnon (1950) and Liu et. al (2017), with the exception of the form in which iron was added (see below). We prepared the stock solutions 1-6 and micronutrient-stock solution given below, and used the amounts indicated to prepare 1 liter of nutrient solution:

(1) 4 mL of 1.00 M/L  $\text{KH}_2\text{PO}_4$

(2) 20 mL of 1.00 M/L  $\text{KNO}_3$

(3) 20 mL of 1.00 M/L  $\text{Ca}(\text{NO}_3)_2$

(4) 8 mL of 1.00 M/L  $\text{MgSO}_4$

(5) 4 ml of micronutrient stock solution (see recipe below)

(6) 10 ml of 1000 mg/liter iron from iron chelate (Fe-EDTA)

#### \* Micronutrient-stock solution per liter:

2.86 g  $\text{H}_3\text{BO}_3$

1.81 g  $\text{MnCl}_2 \cdot 4\text{H}_2\text{O}$

0.22 g  $\text{ZnSO}_4 \cdot 7\text{H}_2\text{O}$

0.08 g  $\text{CuSO}_4 \cdot 5\text{H}_2\text{O}$

0.018 g  $\text{H}_2\text{MoO}_4$  (Assaying 94%  $\text{MoO}_3$ )

\* Hoagland's recipe called for 1 ml of 0.5% iron tartrate stock per liter of nutrient solution but we used iron chelate instead.

Reference: Hoagland, D.R. & Arnon, D.I. 1950. The water-culture method of growing plants without soil. California Agricultural Experiment Station, Circular 347.

613 **Table S1** Detailed information on the eight alien target species and 15 native competitor species used in this study

| Species                                                    | Family          | Status | Life history          | Seed sources                  | Sowing date |
|------------------------------------------------------------|-----------------|--------|-----------------------|-------------------------------|-------------|
| <i>Bidens frondosa</i> L.                                  | Compositae      | Alien  | Annual                | Zhejiang                      | 26.06.2020  |
| <i>Bidens pilosa</i> L.                                    | Compositae      | Alien  | Annual                | Zhejiang                      | 26.06.2020  |
| <i>Solidago canadensis</i> L.                              | Compositae      | Alien  | Perennial             | Zhejiang                      | 26.06.2020  |
| <i>Xanthium strumarium</i> L.                              | Compositae      | Alien  | Annual                | Nei Mongol                    | 26.06.2020  |
| <i>Abutilon theophrasti</i> Medik.                         | Malvaceae       | Alien  | Annual                | Jilin                         | 26.06.2020  |
| <i>Hibiscus trionum</i> L.                                 | Malvaceae       | Alien  | Annual                | Jilin                         | 05.07.2020  |
| <i>Lolium perenne</i> L.                                   | Poaceae         | Alien  | Perennial             | Greenwood flower seed company | 26.06.2020  |
| <i>Paspalum notatum</i> Flügge                             | Poaceae         | Alien  | Perennial             | Zhejiang                      | 15.05.2020  |
| <i>Catolobus pendulus</i> (L.) Al-Shehbaz <sup>5</sup>     | Brassicaceae    | Native | Biennial              | Nei Mongol                    | 26.06.2020  |
| <i>Cynanchum chinense</i> R. Br. <sup>2</sup>              | Apocynaceae     | Native | Annual                | Nei Mongol                    | 26.06.2020  |
| <i>Lappula myosotis</i> V. Wolf <sup>1</sup>               | Boraginaceae    | Native | Annual or<br>Biennial | Nei Mongol                    | 26.06.2020  |
| <i>Artemisia rubripes</i> Nakai <sup>4</sup>               | Compositae      | Native | Perennial             | Nei Mongol                    | 26.06.2020  |
| <i>Achillea asiatica</i> Serg. <sup>2</sup>                | Compositae      | Native | Perennial             | Nei Mongol                    | 26.06.2020  |
| <i>Convolvulus arvensis</i> L. <sup>3</sup>                | Convolvulaceae  | Native | Perennial             | Jilin                         | 26.06.2020  |
| <i>Gypsophila licentiana</i> Hand.-Mazz. <sup>4</sup>      | Caryophyllaceae | Native | Perennial             | Nei Mongol                    | 26.06.2020  |
| <i>Euphorbia humifusa</i> Willd. <sup>5</sup>              | Euphorbiaceae   | Native | Annual                | Nei Mongol                    | 26.06.2020  |
| <i>Chloris virgata</i> Sw. <sup>2</sup>                    | Poaceae         | Native | Annual                | Nei Mongol                    | 26.06.2020  |
| <i>Cleistogenes squarrosa</i> (Trin.) Keng <sup>5</sup>    | Poaceae         | Native | Perennial             | Jilin                         | 26.06.2020  |
| <i>Digitaria sanguinalis</i> (L.) Scop. <sup>1</sup>       | Poaceae         | Native | Annual                | Jilin                         | 26.06.2020  |
| <i>Echinochloa crus-galli</i> (L.) P.Beauv. <sup>4</sup>   | Poaceae         | Native | Annual                | Jilin                         | 26.06.2020  |
| <i>Setaria pumila</i> (Poir.) Roem. & Schult. <sup>3</sup> | Poaceae         | Native | Annual                | Jilin                         | 27.06.2020  |
| <i>Portulaca oleracea</i> L. <sup>3</sup>                  | Portulacaceae   | Native | Annual                | Nei Mongol                    | 26.06.2020  |
| <i>Rumex crispus</i> L. <sup>1</sup>                       | Polygonaceae    | Native | Perennial             | Nei Mongol                    | 26.06.2020  |

614 <sup>1,2,3,4,5</sup> Allocation of native species to the five native communities; each group included three different native species

615 **Table S2** Output of the models residual standard deviations sigma for individual alien species. Shown are the model estimates and  
616 standard errors as well as the lower (L) and upper (U) values of the 95% and 90% credible intervals (CI).

|                                                  |                                    | Estimate | SE    | L95% CI | U95% CI | L90% CI | U90% CI |
|--------------------------------------------------|------------------------------------|----------|-------|---------|---------|---------|---------|
| <b>Biomass production of alien target plants</b> | <i>Abutilon theophrasti</i> Medik. | -0.785*  | 0.138 | -1.033  | -0.499  | -1.001  | -0.547  |
|                                                  | <i>Bidens frondosa</i> L.          | 1.074*   | 0.127 | 0.839   | 1.341   | 0.874   | 1.290   |
|                                                  | <i>Bidens pilosa</i> L.            | 0.327*   | 0.126 | 0.092   | 0.590   | 0.128   | 0.544   |
|                                                  | <i>Hibiscus trionum</i> L.         | -0.730*  | 0.175 | -1.072  | -0.388  | -1.018  | -0.443  |
|                                                  | <i>Lolium perenne</i> L.           | 0.667*   | 0.138 | 0.413   | 0.953   | 0.452   | 0.907   |
|                                                  | <i>Paspalum notatum</i> Flügge     | 0.444*   | 0.123 | 0.217   | 0.700   | 0.249   | 0.659   |
|                                                  | <i>Solidago canadensis</i> L.      | -0.488*  | 0.125 | -0.718  | -0.232  | -0.688  | -0.277  |
|                                                  | <i>Xanthium strumarium</i> L.      | 0.681*   | 0.127 | 0.445   | 0.944   | 0.480   | 0.900   |
| <b>Biomass production of native communities</b>  | <i>Abutilon theophrasti</i> Medik. | 0.373*   | 0.133 | 0.135   | 0.652   | 0.169   | 0.602   |
|                                                  | <i>Bidens frondosa</i> L.          | 0.591*   | 0.129 | 0.354   | 0.862   | 0.388   | 0.810   |
|                                                  | <i>Bidens pilosa</i> L.            | 0.511*   | 0.125 | 0.275   | 0.766   | 0.310   | 0.725   |
|                                                  | <i>Hibiscus trionum</i> L.         | 0.603*   | 0.127 | 0.370   | 0.869   | 0.403   | 0.822   |
|                                                  | <i>Lolium perenne</i> L.           | 0.484*   | 0.146 | 0.216   | 0.788   | 0.253   | 0.737   |
|                                                  | <i>Paspalum notatum</i> Flügge     | 0.960*   | 0.122 | 0.731   | 1.209   | 0.768   | 1.168   |
|                                                  | <i>Solidago canadensis</i> L.      | 0.721*   | 0.113 | 0.510   | 0.949   | 0.539   | 0.911   |
|                                                  | <i>Xanthium strumarium</i> L.      | 0.563*   | 0.123 | 0.335   | 0.816   | 0.369   | 0.773   |
| <b>Biomass proportion of alien target plants</b> | <i>Abutilon theophrasti</i> Medik. | 2.471*   | 0.134 | 2.219   | 2.749   | 2.258   | 2.700   |
|                                                  | <i>Bidens frondosa</i> L.          | 2.559*   | 0.133 | 2.314   | 2.833   | 2.353   | 2.783   |
|                                                  | <i>Bidens pilosa</i> L.            | 2.206*   | 0.128 | 1.971   | 2.470   | 2.004   | 2.426   |
|                                                  | <i>Hibiscus trionum</i> L.         | 2.624*   | 0.141 | 2.355   | 2.912   | 2.398   | 2.860   |
|                                                  | <i>Lolium perenne</i> L.           | 2.962*   | 0.144 | 2.698   | 3.262   | 2.737   | 3.211   |
|                                                  | <i>Paspalum notatum</i> Flügge     | 2.908*   | 0.123 | 2.679   | 3.162   | 2.712   | 3.116   |
|                                                  | <i>Solidago canadensis</i> L.      | 2.416*   | 0.125 | 2.176   | 2.669   | 2.218   | 2.626   |
|                                                  | <i>Xanthium strumarium</i> L.      | 2.596*   | 0.127 | 2.355   | 2.858   | 2.394   | 2.811   |



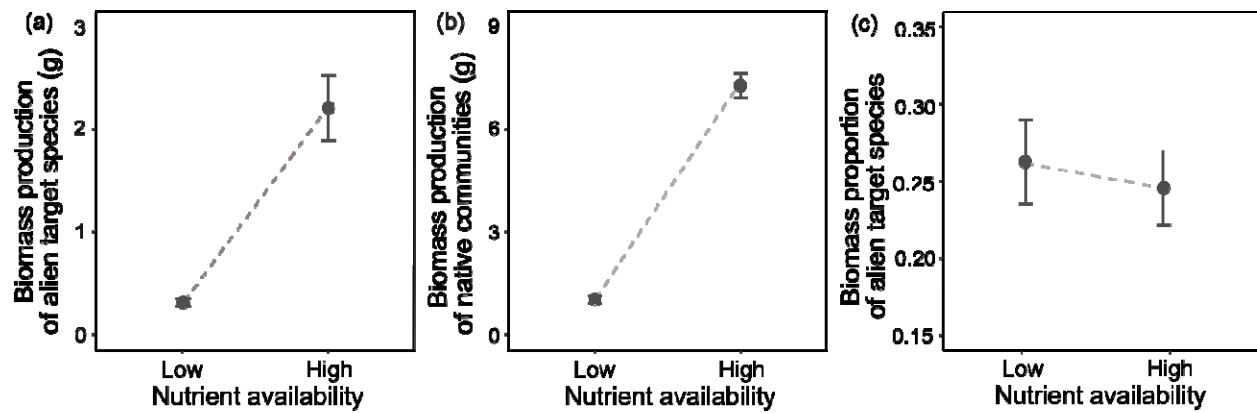

**Figure S1** Mean values ( $\pm$ SE) of biomass production of the alien target species (a) and the native communities (b) and biomass proportion of the alien target species (c) under different nutrient availability conditions.

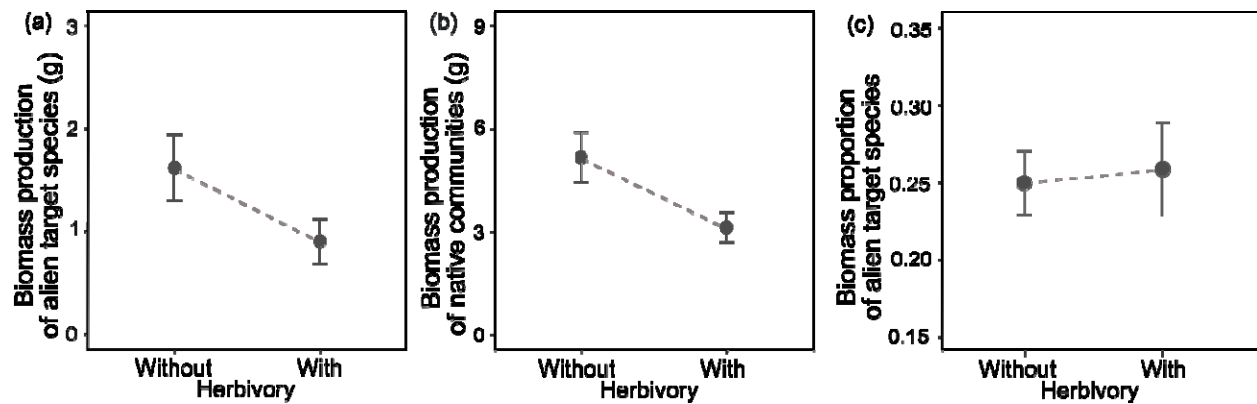

**Figure S2** Mean values ( $\pm$ SE) of biomass production of the alien target species (a) and the native communities (b) and biomass proportion of the alien target species (c) growing with and without herbivory.

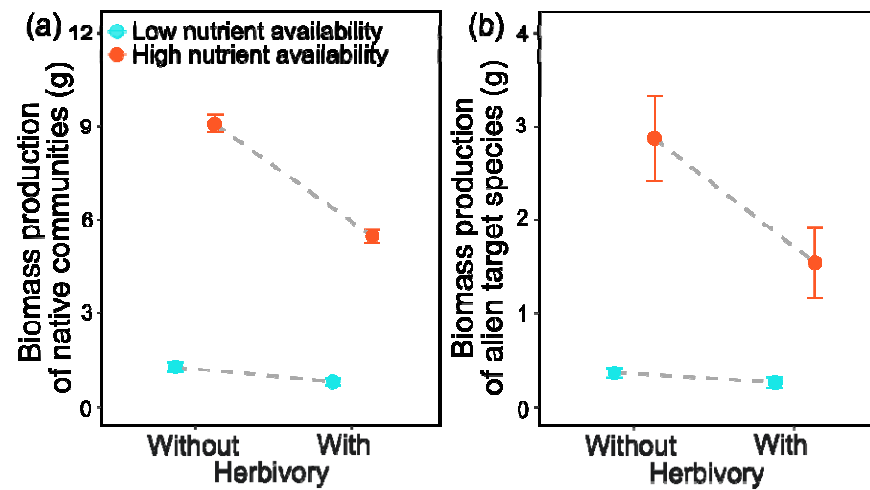

**Figure S3** Mean values ( $\pm$ SE) of biomass production of native communities (a) and alien target species (b) under each combination of two nutrient availability (low vs high) and two herbivory (with vs without) treatments.

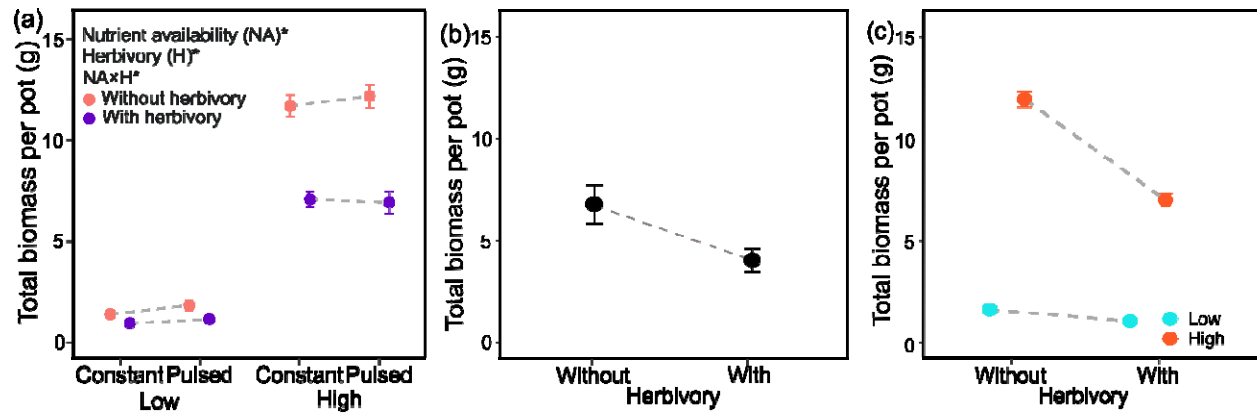

**Figure S4** Mean values ( $\pm$ SE) of total biomass per pot under each combination of two nutrient availability (low *vs* high), two nutrient fluctuation (constant *vs* pulsed) and two herbivory (with *vs* without) treatments (a), with and without herbivory (b), and under each combination of two nutrient availability (low *vs* high) and two herbivory (with *vs* without) treatments (c). Parameters whose 95% credible intervals do not overlap with zero are indicated with asterisks (\*).
